# Supplementary material for: Association of Patient-Level and Hospital-Level Factors With Timely Fracture Care by Race
Source: PubMed Central journal article supplement (PMC9713603; doi:10.1001/jamanetworkopen.2022.44357), 2022-11-30

## Supplemental Online Content

Gitajn IL, Werth P, Fernandes E, et al; PREP-IT Investigators. Association of patient-level and hospital-level factors with timely fracture care by race. *JAMA Netw Open*. 2022;5(11):e2244357. doi:10.1001/jamanetworkopen.2022.44357

**eTable.** Average Marginal Estimates Follow-up to Mixed Effects Model Examining Time-To-Surgery

**eFigure 1.** Variance Inflation Factor for All Model Predictors

**eFigure 2.** Odds Ratios for Meeting Time-to-Operating Room Benchmarks per Site

This supplemental material has been provided by the authors to give readers additional information about their work.

| <b>eTable. Average Marginal Estimates Follow-up to Mixed Effects Model<br/>Examining Time-To-Surgery</b> |                                      |                        |               |
|----------------------------------------------------------------------------------------------------------|--------------------------------------|------------------------|---------------|
| <b>Predictor</b>                                                                                         |                                      | <b>AME<sup>1</sup></b> | <b>95% CI</b> |
| Age                                                                                                      |                                      | 0.2%                   | 0.1 - 0.3     |
| Sex: <i>Male</i>                                                                                         |                                      | 0.5%                   | -2.7 – 3.8    |
| Race: <i>White</i>                                                                                       |                                      | -0.6%                  | -5.0 – 3.8    |
| Fracture Type: <i>Femur</i>                                                                              |                                      | 1.2%                   | -2.3 – 4.7    |
| ASA: <i>Class II</i>                                                                                     |                                      | 10.5%                  | 3.6 – 17.4    |
| ASA: <i>Class III</i>                                                                                    |                                      | 13.1%                  | 6.2 – 20.1    |
| ASA: <i>Class IV</i>                                                                                     |                                      | 23.8%                  | 15.1 – 32.5   |
| Employed: <i>Yes</i>                                                                                     |                                      | -4.4%                  | -8.4 – -0.4   |
| Insurance: <i>Yes</i>                                                                                    |                                      | -6.0%                  | -13.1 – 1.1   |
| Body Mass Index                                                                                          |                                      | 0.3%                   | 0.1 – 0.5     |
| Hospital Population Insurance Coverage                                                                   |                                      | -1.0%                  | -1.7 – -0.3   |
| Hospital Population Diversity                                                                            |                                      | 2.1%                   | -0.5 – 4.7    |
| <b>Interaction</b>                                                                                       | <b>Hospital Population Diversity</b> |                        |               |
| Hospital Population Insurance Coverage                                                                   | (-)1 SD                              | -1.4%                  | -2.4 – -0.5   |
|                                                                                                          | Mean                                 | -0.9%                  | -1.6 – -0.3   |
|                                                                                                          | (+)1 SD                              | -0.3%                  | -1.1 – 0.4    |
| <i>Note:</i> <sup>1</sup> Average marginal estimates.                                                    |                                      |                        |               |

**eFigure 1.** Variance inflation factor for all model predictors

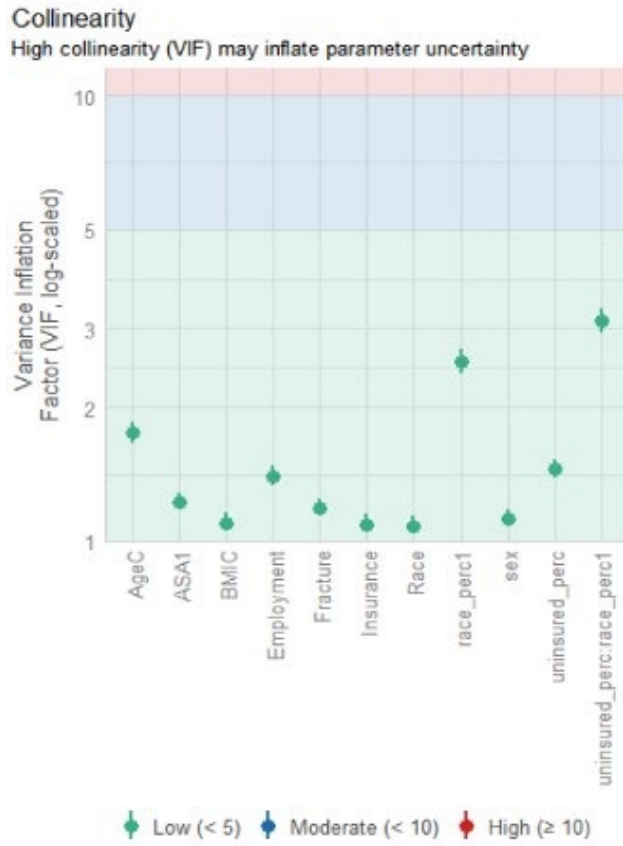

**eFigure 2.** Odds ratios for meeting time-to-operating room benchmarks per site

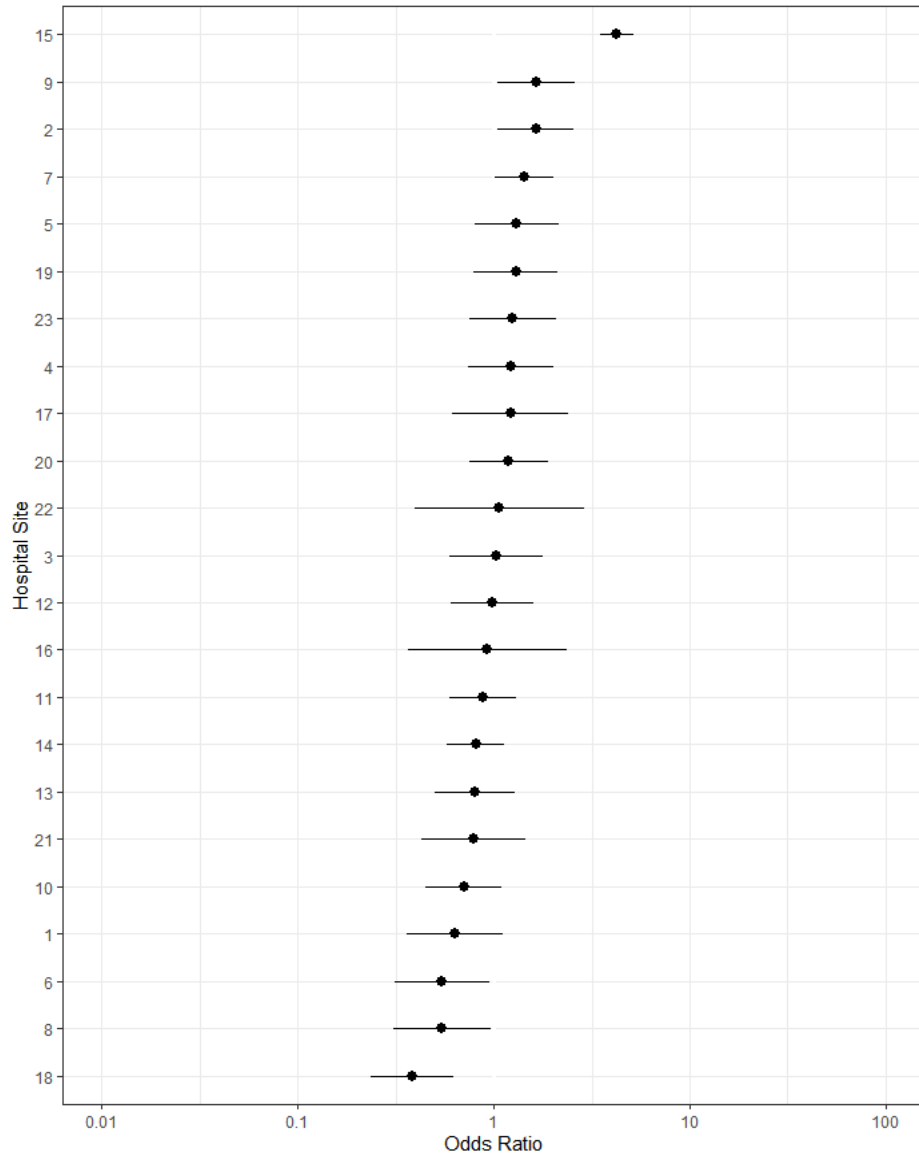

Supplement: jamanetwopen-e2244357-s001.pdf [file jamanetwopen-e2244357-s001.pdf]
