# Supplementary material for: Association of Patient-Level and Hospital-Level Factors With Timely Fracture Care by Race
Source: PubMed Central journal article supplement (PMC9713603; doi:10.1001/jamanetworkopen.2022.44357), 2022-11-30
Supplement: jamanetwopen-e2244357-s002.pdf [file jamanetwopen-e2244357-s002.pdf]

\*Indicates required information. Only first name, last name, and suffix will appear in PubMed.

| <b>*Group Name(s): PREP-IT Investigators</b> |                   |                              |                  |                                                |                                          |                                                         |                                                                                            |
|----------------------------------------------|-------------------|------------------------------|------------------|------------------------------------------------|------------------------------------------|---------------------------------------------------------|--------------------------------------------------------------------------------------------|
| <b>*First Name and Middle Initial(s)</b>     | <b>*Last Name</b> | <b>*Suffix (eg, Jr, III)</b> | Academic Degrees | Institution                                    | Location (city, state/province, country) | Role or Contribution, eg, chair, principal investigator | Group (if more than 1 Group listed in the byline) and/or Subgroup (eg, Steering Committee) |
| Gerard P                                     | Slobogean         |                              | MD               | University of Maryland School of Medicine      | Baltimore, Maryland                      | Principal Investigator                                  | Executive Committee, Steering Committee                                                    |
| Sheila                                       | Sprague           |                              | PhD              | McMaster University                            | Hamilton, Ontario                        | Principal Investigator                                  | Executive Committee, Steering Committee                                                    |
| Jeffrey                                      | Wells             |                              |                  | Trauma Survivors Network                       | Falls Church, Virginia                   | Patient Representative                                  | Executive Committee, Steering Committee, Patient Centred Outcomes Core                     |
| Mohit                                        | Bhandari          |                              | MD PhD           | McMaster University                            | Hamilton, Ontario                        | Principal Investigator                                  | Executive Committee, Steering Committee                                                    |
| Anthony D                                    | Harris            |                              |                  | University of Maryland School of Medicine      | Baltimore, MD                            | Committee Member                                        | Steering Committee, Adjudication Committee                                                 |
| C Daniel                                     | Mullins           |                              |                  | University of Maryland                         | Baltimore, MD                            | Committee Member                                        | Steering Committee                                                                         |
| Lehana                                       | Thabane           |                              |                  | McMaster University                            | Hamilton, Ontario                        | Committee Member                                        | Steering Committee                                                                         |
| Amber                                        | Wood              |                              |                  | Association of periOperative Registered Nurses | Denver, CO                               | Committee Member                                        | Steering Committee                                                                         |
| Gregory J                                    | Della Rocca       |                              |                  | University of Missouri                         | Columbia, MO                             | Chair                                                   | Adjudication Committee                                                                     |
| Joan                                         | Hebden            |                              |                  | University of Maryland                         | Baltimore, MD                            | Committee Member                                        | Adjudication Committee                                                                     |
| Kyle J                                       | Jeray             |                              |                  | Greenville Health System                       | Greenville, SC                           | Committee Member                                        | Adjudication Committee                                                                     |
| Lucas S                                      | Marchand          |                              |                  | University of Maryland                         | Baltimore, MD                            | Committee Member                                        | Adjudication Committee                                                                     |
| Lyndsay M                                    | O'Hara            |                              |                  | University of Maryland School of Medicine      | Baltimore, MD                            | Committee Member                                        | Adjudication Committee                                                                     |
| Robert                                       | Zura              |                              |                  | LSU Health                                     | New Orleans, LA                          | Committee Member                                        | Adjudication Committee                                                                     |
| Christopher                                  | Lee               |                              |                  | University of California                       | Los Angeles, CA                          | Committee Member                                        | Adjudication Committee                                                                     |
| Joseph                                       | Patterson         |                              |                  | University of Southern California              | Los Angeles, CA                          | Committee Member                                        | Adjudication Committee                                                                     |
| Michael J                                    | Gardner           |                              |                  | Stanford University School of Medicine         | Palo Alto, CA                            | Chair                                                   | Data and Safety Monitoring Committee                                                       |
| Jenna                                        | Blasman           |                              |                  |                                                | Kitchener, ON                            | Patient Representative                                  | Data and Safety Monitoring Committee                                                       |

Supplemental Online Content: Nonauthor Collaborators

\*Indicates required information. Only first name, last name, and suffix will appear in PubMed.

| *First Name and Middle Initial(s) | *Last Name  | *Suffix (eg, Jr, III) | Academic Degrees | Institution                               | Location (city, state/province, country) | Role or Contribution, eg, chair, principal investigator | Group (if more than 1 Group listed in the byline) and/or Subgroup (eg, Steering Committee) |
|-----------------------------------|-------------|-----------------------|------------------|-------------------------------------------|------------------------------------------|---------------------------------------------------------|--------------------------------------------------------------------------------------------|
| Jonah                             | Davies      |                       |                  | University of Washington                  | Seattle, WA                              | Committee Member                                        | Data and Safety Monitoring Committee                                                       |
| Stephen                           | Liang       |                       |                  | Washington University                     | St. Louis, MO                            | Committee Member                                        | Data and Safety Monitoring Committee                                                       |
| Monica                            | Taljaard    |                       |                  | Ottawa Hospital Research Institute        | Ottawa, ON                               | Committee Member                                        | Data and Safety Monitoring Committee                                                       |
| PJ                                | Devereaux   |                       |                  | McMaster University                       | Hamilton, Ontario                        | Committee Member                                        | Research Methodology Core                                                                  |
| Gordon H                          | Guyatt      |                       |                  | McMaster University                       | Hamilton, Ontario                        | Committee Member                                        | Research Methodology Core                                                                  |
| Lehana                            | Thabane     |                       |                  | McMaster University                       | Hamilton, Ontario                        | Committee Member                                        | Research Methodology Core                                                                  |
| Debra                             | Marvel      |                       |                  |                                           | Baltimore, MD                            | Patient Representative                                  | Patient Centred Outcomes Core                                                              |
| Jana                              | Palmer      |                       |                  |                                           | Baltimore, MD                            | Patient Representative                                  | Patient Centred Outcomes Core                                                              |
| Jeff                              | Friedrich   |                       |                  | Slate Magazine                            | Washington, DC                           | Editor                                                  | Patient Centred Outcomes Core                                                              |
| C Daniel                          | Mullins     |                       |                  | University of Maryland                    | Baltimore, MD                            | Core Member                                             | Patient Centred Outcomes Core                                                              |
| Nathan N                          | O'Hara      |                       |                  | University of Maryland School of Medicine | Baltimore, MD                            | Core Member                                             | Patient Centred Outcomes Core                                                              |
| Ms Frances                        | Grissom     |                       |                  | Trauma Survivor Network                   | Baltimore, MD                            | Core Member                                             | Patient Centred Outcomes Core                                                              |
| Gregory J                         | Della Rocca |                       |                  | University of Missouri                    | Columbia, MO                             | Core Member                                             | Orthopaedic Surgery Core                                                                   |
| I Leah                            | Gitajn      |                       |                  | Dartmouth University                      | Hanover, NH                              | Core Member                                             | Orthopaedic Surgery Core                                                                   |
| Kyle J                            | Jeray       |                       |                  | Greenville Health System                  | Greenville, SC                           | Core Member                                             | Orthopaedic Surgery Core                                                                   |

Supplemental Online Content: Nonauthor Collaborators

\*Indicates required information. Only first name, last name, and suffix will appear in PubMed.

| *First Name and Middle Initial(s) | *Last Name  | *Suffix (eg, Jr, III) | Academic Degrees | Institution                                  | Location (city, state/province, country) | Role or Contribution, eg, chair, principal investigator | Group (if more than 1 Group listed in the byline) and/or Subgroup (eg, Steering Committee) |
|-----------------------------------|-------------|-----------------------|------------------|----------------------------------------------|------------------------------------------|---------------------------------------------------------|--------------------------------------------------------------------------------------------|
| Saam                              | Morshed     |                       |                  | San Francisco General Hospital               | San Francisco, CA                        | Core Member                                             | Orthopaedic Surgery Core                                                                   |
| Robert V                          | O'Toole     |                       |                  | University of Maryland School of Medicine    | Baltimore, MD                            | Core Member                                             | Orthopaedic Surgery Core                                                                   |
| Bradley A                         | Petrisor    |                       |                  | Hamilton Health Sciences                     | Hamilton, Ontario                        | Core Member                                             | Orthopaedic Surgery Core                                                                   |
| Franca                            | Mossuto     |                       |                  | Hamilton Health Sciences                     | Hamilton, Ontario                        | Core Member                                             | Operating Room Core                                                                        |
| Anthony D                         | Harris      |                       |                  | University of Maryland School of Medicine    | Baltimore, MD                            | Core Member                                             | Infectious Disease Core                                                                    |
| Manjari G                         | Joshi       |                       |                  | University of Maryland School of Medicine    | Baltimore, MD                            | Core Member                                             | Infectious Disease Core                                                                    |
| Jean Claude                       | D'Alleyrand |                       |                  | Walter Reed National Military Medical Center | Bethesda, MD                             | Core Member                                             | Military Core                                                                              |
| Justin                            | Fowler      |                       |                  | United States Army                           | USA                                      | Core Member                                             | Military Core                                                                              |
| Jessica                           | Rivera      |                       |                  | San Antonio Military Medical Center          | San Antonio, TX                          | Core Member                                             | Military Core                                                                              |
| Max                               | Talbot      |                       |                  | Canadian Armed Forces                        | Montreal, QC                             | Core Member                                             | Military Core                                                                              |
| Sheila                            | Sprague     |                       | PhD              | McMaster University                          | Hamilton, Ontario                        | Principal Investigator                                  | McMaster University Methods Centre                                                         |
| Mohit                             | Bhandari    |                       | MD PhD           | McMaster University                          | Hamilton, Ontario                        | Principal Investigator                                  | McMaster University Methods Centre                                                         |
| Shannon                           | Dodds       |                       |                  | McMaster University                          | Hamilton, Ontario                        | Research Coordinator                                    | McMaster University Methods Centre                                                         |
| Silvia                            | Li          |                       | MSc              | McMaster University                          | Hamilton, Ontario                        | Research Coordinator                                    | McMaster University Methods Centre                                                         |
| David                             | Pogorzelski |                       |                  | McMaster University                          | Hamilton, Ontario                        | Research Coordinator                                    | McMaster University Methods Centre                                                         |
| Alejandra                         | Rojas       |                       |                  | McMaster University                          | Hamilton, Ontario                        | Research Coordinator                                    | McMaster University Methods Centre                                                         |
| Gina                              | Del Fabbro  |                       | BPH              | McMaster University                          | Hamilton, Ontario                        | Research Coordinator                                    | McMaster University Methods Centre                                                         |

Supplemental Online Content: Nonauthor Collaborators

\*Indicates required information. Only first name, last name, and suffix will appear in PubMed.

| *First Name and Middle Initial(s) | *Last Name    | *Suffix (eg, Jr, III) | Academic Degrees | Institution                               | Location (city, state/province, country) | Role or Contribution, eg, chair, principal investigator      | Group (if more than 1 Group listed in the byline) and/or Subgroup (eg, Steering Committee) |
|-----------------------------------|---------------|-----------------------|------------------|-------------------------------------------|------------------------------------------|--------------------------------------------------------------|--------------------------------------------------------------------------------------------|
| Olivia P                          | Szasz         |                       |                  | McMaster University                       | Hamilton, Ontario                        | Research Coordinator                                         | McMaster University Methods Centre                                                         |
| Diane                             | Heels Ansdell |                       |                  | McMaster University                       | Hamilton, Ontario                        | Statistician                                                 | McMaster University Methods Centre                                                         |
| Paula                             | McKay         |                       | BSc              | McMaster University                       | Hamilton, Ontario                        | Manager                                                      | McMaster University Methods Centre                                                         |
| Kevin                             | Murphy        |                       |                  | McMaster University                       | Hamilton, Ontario                        | Research Coordinator                                         | McMaster University Methods Centre                                                         |
| Gerard P                          | Slobogean     |                       |                  | University of Maryland School of Medicine | Baltimore, MD                            | Principal Investigator                                       | University of Maryland School of Medicine Administrative Center                            |
| Nathan N                          | O'Hara        |                       |                  | University of Maryland School of Medicine | Baltimore, MD                            | Manager                                                      | University of Maryland School of Medicine Administrative Center                            |
| Andrea                            | Howe          |                       |                  | University of Maryland School of Medicine | Baltimore, MD                            | Project Manager                                              | University of Maryland School of Medicine Administrative Center                            |
| Haley                             | Demyanovich   |                       |                  | University of Maryland School of Medicine | Baltimore, MD                            | Project Manager                                              | University of Maryland School of Medicine Administrative Center                            |
| C Daniel                          | Mullins       |                       |                  | Univeristy of Maryland School of Pharmacy | Baltimore, MD                            | Executive Director                                           | University of Maryland School of Pharmacy, The PATIENTS Program                            |
| Eric                              | Kettering     |                       |                  | Univeristy of Maryland School of Pharmacy | Baltimore, MD                            | Senior Instructional Technology and Dissemination Specialist | University of Maryland School of Pharmacy, The PATIENTS Program                            |
| Genevieve                         | Polk          |                       |                  | Univeristy of Maryland School of Pharmacy | Baltimore, MD                            | Assistant Director, Dissemination and Research               | University of Maryland School of Pharmacy, The PATIENTS Program                            |

Supplemental Online Content: Nonauthor Collaborators

\*Indicates required information. Only first name, last name, and suffix will appear in PubMed.

| *First Name and Middle Initial(s) | *Last Name  | *Suffix (eg, Jr, III) | Academic Degrees | Institution                                                                   | Location (city, state/province, country) | Role or Contribution, eg, chair, principal investigator | Group (if more than 1 Group listed in the byline) and/or Subgroup (eg, Steering Committee) |
|-----------------------------------|-------------|-----------------------|------------------|-------------------------------------------------------------------------------|------------------------------------------|---------------------------------------------------------|--------------------------------------------------------------------------------------------|
| Michelle                          | Medeiros    |                       |                  | Univeristy of Maryland School of Pharmacy                                     | Baltimore, MD                            | Director of Research                                    | University of Maryland School of Pharmacy, The PATIENTS Program                            |
| <b>PREP IT Clinical Sites:</b>    |             |                       |                  |                                                                               |                                          |                                                         |                                                                                            |
| Robert V                          | O'Toole     |                       |                  | University of Maryland School of Medicine, R Adams Cowley Shock Trauma Center | Baltimore, MD                            | Co-Investigator                                         | Lead Clinical Site (Aqueous-PREP and PREPARE)                                              |
| Jean Claude                       | D'Alleyrand |                       |                  | University of Maryland School of Medicine, R Adams Cowley Shock Trauma Center | Baltimore, MD                            | Co-Investigator                                         | Lead Clinical Site (Aqueous-PREP and PREPARE)                                              |
| Andrew                            | Eglseder    |                       |                  | University of Maryland School of Medicine, R Adams Cowley Shock Trauma Center | Baltimore, MD                            | Co-Investigator                                         | Lead Clinical Site (Aqueous-PREP and PREPARE)                                              |
| Aaron                             | Johnson     |                       |                  | University of Maryland School of Medicine, R Adams Cowley Shock Trauma Center | Baltimore, MD                            | Co-Investigator                                         | Lead Clinical Site (Aqueous-PREP and PREPARE)                                              |
| Christopher                       | Langhammer  |                       |                  | University of Maryland School of Medicine, R Adams Cowley Shock Trauma Center | Baltimore, MD                            | Co-Investigator                                         | Lead Clinical Site (Aqueous-PREP and PREPARE)                                              |
| Christopher                       | Lebrun      |                       |                  | University of Maryland School of Medicine, R Adams Cowley Shock Trauma Center | Baltimore, MD                            | Co-Investigator                                         | Lead Clinical Site (Aqueous-PREP and PREPARE)                                              |
| Jason                             | Nascone     |                       |                  | University of Maryland School of Medicine, R Adams Cowley Shock Trauma Center | Baltimore, MD                            | Co-Investigator                                         | Lead Clinical Site (Aqueous-PREP and PREPARE)                                              |
| Raymond                           | Pensy       |                       |                  | University of Maryland School of Medicine, R Adams Cowley Shock Trauma Center | Baltimore, MD                            | Co-Investigator                                         | Lead Clinical Site (Aqueous-PREP and PREPARE)                                              |

## Supplemental Online Content: Nonauthor Collaborators

\*Indicates required information. Only first name, last name, and suffix will appear in PubMed.

| *First Name and Middle Initial(s) | *Last Name  | *Suffix (eg, Jr, III) | Academic Degrees | Institution                                                                   | Location (city, state/province, country) | Role or Contribution, eg, chair, principal investigator | Group (if more than 1 Group listed in the byline) and/or Subgroup (eg, Steering Committee) |
|-----------------------------------|-------------|-----------------------|------------------|-------------------------------------------------------------------------------|------------------------------------------|---------------------------------------------------------|--------------------------------------------------------------------------------------------|
| Andrew                            | Pollak      |                       |                  | University of Maryland School of Medicine, R Adams Cowley Shock Trauma Center | Baltimore, MD                            | Co-Investigator                                         | Lead Clinical Site (Aqueous-PREP and PREPARE)                                              |
| Marcus                            | Sciadini    |                       |                  | University of Maryland School of Medicine, R Adams Cowley Shock Trauma Center | Baltimore, MD                            | Co-Investigator                                         | Lead Clinical Site (Aqueous-PREP and PREPARE)                                              |
| Gerard P                          | Slobogean   |                       |                  | University of Maryland School of Medicine, R Adams Cowley Shock Trauma Center | Baltimore, MD                            | Local Principal Investigator                            | Lead Clinical Site (Aqueous-PREP and PREPARE)                                              |
| Yasmin                            | Degano      |                       |                  | University of Maryland School of Medicine, R Adams Cowley Shock Trauma Center | Baltimore, MD                            | Research Assistant                                      | Lead Clinical Site (Aqueous-PREP and PREPARE)                                              |
| Haley K                           | Demyanovich |                       |                  | University of Maryland School of Medicine, R Adams Cowley Shock Trauma Center | Baltimore, MD                            | Research Coordinator                                    | Lead Clinical Site (Aqueous-PREP and PREPARE)                                              |
| Andrea                            | Howe        |                       |                  | University of Maryland School of Medicine, R Adams Cowley Shock Trauma Center | Baltimore, MD                            | Research Coordinator                                    | Lead Clinical Site (Aqueous-PREP and PREPARE)                                              |
| Nathan N                          | O'Hara      |                       |                  | University of Maryland School of Medicine, R Adams Cowley Shock Trauma Center | Baltimore, MD                            | Manager                                                 | Lead Clinical Site (Aqueous-PREP and PREPARE)                                              |
| Heather                           | Phipps      |                       |                  | University of Maryland School of Medicine, R Adams Cowley Shock Trauma Center | Baltimore, MD                            | Research Coordinator                                    | Lead Clinical Site (Aqueous-PREP and PREPARE)                                              |
| Eric                              | Hempfen     |                       |                  | University of Maryland School of Medicine, R Adams Cowley Shock Trauma Center | Baltimore, MD                            | Research Coordinator                                    | Lead Clinical Site (Aqueous-PREP and PREPARE)                                              |
| Brad A                            | Petrisor    |                       |                  | Hamilton Health Sciences – General Site                                       | Hamilton, ON                             | Local Principal Investigator                            | Aqueous-PREP and PREPARE                                                                   |
| Herman                            | Johal       |                       |                  | Hamilton Health Sciences – General Site                                       | Hamilton, ON                             | Local Principal Investigator                            | Aqueous-PREP and PREPARE                                                                   |

## Supplemental Online Content: Nonauthor Collaborators

\*Indicates required information. Only first name, last name, and suffix will appear in PubMed.

| *First Name and Middle Initial(s) | *Last Name | *Suffix (eg, Jr, III) | Academic Degrees | Institution                             | Location (city, state/province, country) | Role or Contribution, eg, chair, principal investigator | Group (if more than 1 Group listed in the byline) and/or Subgroup (eg, Steering Committee) |
|-----------------------------------|------------|-----------------------|------------------|-----------------------------------------|------------------------------------------|---------------------------------------------------------|--------------------------------------------------------------------------------------------|
| Bill                              | Ristevski  |                       |                  | Hamilton Health Sciences – General Site | Hamilton, ON                             | Co-Investigator                                         | Aqueous-PREP and PREPARE                                                                   |
| Dale                              | Williams   |                       |                  | Hamilton Health Sciences – General Site | Hamilton, ON                             | Co-Investigator                                         | Aqueous-PREP and PREPARE                                                                   |
| Matthew                           | Denkers    |                       |                  | Hamilton Health Sciences – General Site | Hamilton, ON                             | Co-Investigator                                         | Aqueous-PREP and PREPARE                                                                   |
| Krishan                           | Rajaratnam |                       |                  | Hamilton Health Sciences – General Site | Hamilton, ON                             | Co-Investigator                                         | Aqueous-PREP and PREPARE                                                                   |
| Jamal                             | Al-Asiri   |                       |                  | Hamilton Health Sciences – General Site | Hamilton, ON                             | Co-Investigator                                         | Aqueous-PREP and PREPARE                                                                   |
| Jodi                              | Gallant    |                       |                  | Hamilton Health Sciences – General Site | Hamilton, ON                             | Clinical Research Coordinator                           | Aqueous-PREP and PREPARE                                                                   |
| Kaitlyn                           | Pusztai    |                       |                  | Hamilton Health Sciences – General Site | Hamilton, ON                             | Clinical Research Coordinator                           | Aqueous-PREP and PREPARE                                                                   |
| Sarah                             | MacRae     |                       |                  | Hamilton Health Sciences – General Site | Hamilton, ON                             | Clinical Research Coordinator                           | Aqueous-PREP and PREPARE                                                                   |
| Sara                              | Renaud     |                       |                  | Hamilton Health Sciences – General Site | Hamilton, ON                             | Clinical Research Coordinator                           | Aqueous-PREP and PREPARE                                                                   |
| Roman N                           | Natoli     |                       |                  | IU Health Methodist Hospital            | Indianapolis, IN                         | Local Principal Investigator                            | Aqueous-PREP and PREPARE                                                                   |
| Todd O                            | McKinley   |                       |                  | IU Health Methodist Hospital            | Indianapolis, IN                         | Co-Investigator                                         | Aqueous-PREP and PREPARE                                                                   |
| Walter W                          | Virkus     |                       |                  | IU Health Methodist Hospital            | Indianapolis, IN                         | Co-Investigator                                         | Aqueous-PREP and PREPARE                                                                   |
| Anthony T                         | Sorkin     |                       |                  | IU Health Methodist Hospital            | Indianapolis, IN                         | Co-Investigator                                         | Aqueous-PREP and PREPARE                                                                   |
| Jan P                             | Szatkowski |                       |                  | IU Health Methodist Hospital            | Indianapolis, IN                         | Co-Investigator                                         | Aqueous-PREP and PREPARE                                                                   |
| Brian H                           | Mullis     |                       |                  | IU Health Methodist Hospital            | Indianapolis, IN                         | Co-Investigator                                         | Aqueous-PREP and PREPARE                                                                   |

Supplemental Online Content: Nonauthor Collaborators

\*Indicates required information. Only first name, last name, and suffix will appear in PubMed.

| <b>*First Name and Middle Initial(s)</b> | <b>*Last Name</b> | <b>*Suffix (eg, Jr, III)</b> | Academic Degrees | Institution                         | Location (city, state/province, country) | Role or Contribution, eg, chair, principal investigator | Group (if more than 1 Group listed in the byline) and/or Subgroup (eg, Steering Committee) |
|------------------------------------------|-------------------|------------------------------|------------------|-------------------------------------|------------------------------------------|---------------------------------------------------------|--------------------------------------------------------------------------------------------|
| Yohan                                    | Jang              |                              |                  | IU Health Methodist Hospital        | Indianapolis, IN                         | Co-Investigator                                         | Aqueous-PREP and PREPARE                                                                   |
| Luke A                                   | Lopas             |                              |                  | IU Health Methodist Hospital        | Indianapolis, IN                         | Research Coordinator                                    | Aqueous-PREP and PREPARE                                                                   |
| Lauren C                                 | Hill              |                              |                  | IU Health Methodist Hospital        | Indianapolis, IN                         | Research Coordinator                                    | Aqueous-PREP and PREPARE                                                                   |
| Courtney L                               | Fentz             |                              |                  | IU Health Methodist Hospital        | Indianapolis, IN                         | Research Coordinator                                    | Aqueous-PREP and PREPARE                                                                   |
| Maricela M                               | Diaz              |                              |                  | IU Health Methodist Hospital        | Indianapolis, IN                         | Research Coordinator                                    | Aqueous-PREP and PREPARE                                                                   |
| Krista                                   | Brown             |                              |                  | IU Health Methodist Hospital        | Indianapolis, IN                         | Research Coordinator                                    | Aqueous-PREP and PREPARE                                                                   |
| Katelyn M                                | Garst             |                              |                  | IU Health Methodist Hospital        | Indianapolis, IN                         | Research Coordinator                                    | Aqueous-PREP and PREPARE                                                                   |
| Emma W                                   | Denari            |                              |                  | IU Health Methodist Hospital        | Indianapolis, IN                         | Research Coordinator                                    | Aqueous-PREP and PREPARE                                                                   |
| Patrick                                  | Osborn            |                              |                  | San Antonio Military Medical Center | San Antonio, TX                          | Local Principal Investigator                            | Aqueous-PREP and PREPARE                                                                   |
| Justin                                   | Fowler            |                              |                  | San Antonio Military Medical Center | San Antonio, TX                          | Co-Investigator                                         | Aqueous-PREP and PREPARE                                                                   |
| Sarah                                    | Pierrie           |                              |                  | San Antonio Military Medical Center | San Antonio, TX                          | Local Principal Investigator/Co-Investigator            | Aqueous-PREP and PREPARE                                                                   |
| Maria                                    | Herrera           |                              |                  | San Antonio Military Medical Center | San Antonio, TX                          | Research Coordinator                                    | Aqueous-PREP and PREPARE                                                                   |
| Kyle J                                   | Jeray             |                              |                  | Prisma Health - Upstate             | Greenville, SC                           | Local Principal Investigator                            | Aqueous-PREP and PREPARE                                                                   |
| John D                                   | Adams             |                              |                  | Prisma Health - Upstate             | Greenville, SC                           | Co-Investigator                                         | Aqueous-PREP and PREPARE                                                                   |
| Michael L                                | Beckish           |                              |                  | Prisma Health - Upstate             | Greenville, SC                           | Co-Investigator                                         | Aqueous-PREP and PREPARE                                                                   |



## Supplemental Online Content: Nonauthor Collaborators

\*Indicates required information. Only first name, last name, and suffix will appear in PubMed.

| *First Name and Middle Initial(s) | *Last Name | *Suffix (eg, Jr, III) | Academic Degrees | Institution             | Location (city, state/province, country) | Role or Contribution, eg, chair, principal investigator | Group (if more than 1 Group listed in the byline) and/or Subgroup (eg, Steering Committee) |
|-----------------------------------|------------|-----------------------|------------------|-------------------------|------------------------------------------|---------------------------------------------------------|--------------------------------------------------------------------------------------------|
| Christopher C                     | Bray       |                       |                  | Prisma Health - Upstate | Greenville, SC                           | Co-Investigator                                         | Aqueous-PREP and PREPARE                                                                   |
| Timothy R                         | Brown      |                       |                  | Prisma Health - Upstate | Greenville, SC                           | Co-Investigator                                         | Aqueous-PREP and PREPARE                                                                   |
| Andrew W                          | Cross      |                       |                  | Prisma Health - Upstate | Greenville, SC                           | Co-Investigator                                         | Aqueous-PREP and PREPARE                                                                   |
| Timothy                           | Dew        |                       |                  | Prisma Health - Upstate | Greenville, SC                           | Co-Investigator                                         | Aqueous-PREP and PREPARE                                                                   |
| Gregory K                         | Faucher    |                       |                  | Prisma Health - Upstate | Greenville, SC                           | Co-Investigator                                         | Aqueous-PREP and PREPARE                                                                   |
| Richard W                         | Gurich     | Jr                    |                  | Prisma Health - Upstate | Greenville, SC                           | Co-Investigator                                         | Aqueous-PREP and PREPARE                                                                   |
| David E                           | Lazarus    |                       |                  | Prisma Health - Upstate | Greenville, SC                           | Co-Investigator                                         | Aqueous-PREP and PREPARE                                                                   |
| S John                            | Millon     |                       |                  | Prisma Health - Upstate | Greenville, SC                           | Co-Investigator                                         | Aqueous-PREP and PREPARE                                                                   |
| M Christian                       | Moody      |                       |                  | Prisma Health - Upstate | Greenville, SC                           | Co-Investigator                                         | Aqueous-PREP and PREPARE                                                                   |
| M Jason                           | Palmer     |                       |                  | Prisma Health - Upstate | Greenville, SC                           | Co-Investigator                                         | Aqueous-PREP and PREPARE                                                                   |
| Scott E                           | Porter     |                       |                  | Prisma Health - Upstate | Greenville, SC                           | Co-Investigator                                         | Aqueous-PREP and PREPARE                                                                   |
| Thomas M                          | Schaller   |                       |                  | Prisma Health - Upstate | Greenville, SC                           | Co-Investigator                                         | Aqueous-PREP and PREPARE                                                                   |
| Michael S                         | Sridhar    |                       |                  | Prisma Health - Upstate | Greenville, SC                           | Co-Investigator                                         | Aqueous-PREP and PREPARE                                                                   |
| John L                            | Sanders    |                       |                  | Prisma Health - Upstate | Greenville, SC                           | Co-Investigator                                         | Aqueous-PREP and PREPARE                                                                   |
| L Edwin                           | Rudisill   | Jr                    |                  | Prisma Health - Upstate | Greenville, SC                           | Co-Investigator                                         | Aqueous-PREP and PREPARE                                                                   |

## Supplemental Online Content: Nonauthor Collaborators

\*Indicates required information. Only first name, last name, and suffix will appear in PubMed.

| *First Name and Middle Initial(s) | *Last Name | *Suffix (eg, Jr, III) | Academic Degrees | Institution             | Location (city, state/province, country) | Role or Contribution, eg, chair, principal investigator | Group (if more than 1 Group listed in the byline) and/or Subgroup (eg, Steering Committee) |
|-----------------------------------|------------|-----------------------|------------------|-------------------------|------------------------------------------|---------------------------------------------------------|--------------------------------------------------------------------------------------------|
| Michael J                         | Garitty    |                       |                  | Prisma Health - Upstate | Greenville, SC                           | Co-Investigator                                         | Aqueous-PREP and PREPARE                                                                   |
| Andrew S                          | Poole      |                       |                  | Prisma Health - Upstate | Greenville, SC                           | Co-Investigator                                         | Aqueous-PREP and PREPARE                                                                   |
| Michael L                         | Sims       |                       |                  | Prisma Health - Upstate | Greenville, SC                           | Co-Investigator                                         | Aqueous-PREP and PREPARE                                                                   |
| Clark M                           | Walker     |                       |                  | Prisma Health - Upstate | Greenville, SC                           | Co-Investigator                                         | Aqueous-PREP and PREPARE                                                                   |
| Robert                            | Carlisle   |                       |                  | Prisma Health - Upstate | Greenville, SC                           | Co-Investigator                                         | Aqueous-PREP and PREPARE                                                                   |
| Erin A                            | Hofer      |                       |                  | Prisma Health - Upstate | Greenville, SC                           | Co-Investigator                                         | Aqueous-PREP and PREPARE                                                                   |
| Brandon                           | Huggins    |                       |                  | Prisma Health - Upstate | Greenville, SC                           | Co-Investigator                                         | Aqueous-PREP and PREPARE                                                                   |
| Michael                           | Hunter     |                       |                  | Prisma Health - Upstate | Greenville, SC                           | Co-Investigator                                         | Aqueous-PREP and PREPARE                                                                   |
| William                           | Marshall   |                       |                  | Prisma Health - Upstate | Greenville, SC                           | Co-Investigator                                         | Aqueous-PREP and PREPARE                                                                   |
| Shea B                            | Ray        |                       |                  | Prisma Health - Upstate | Greenville, SC                           | Co-Investigator                                         | Aqueous-PREP and PREPARE                                                                   |
| Cory                              | Smith      |                       |                  | Prisma Health - Upstate | Greenville, SC                           | Co-Investigator                                         | Aqueous-PREP and PREPARE                                                                   |
| Kyle M                            | Altman     |                       |                  | Prisma Health - Upstate | Greenville, SC                           | Co-Investigator                                         | Aqueous-PREP and PREPARE                                                                   |
| Julia C                           | Quirion    |                       |                  | Prisma Health - Upstate | Greenville, SC                           | Co-Investigator                                         | Aqueous-PREP and PREPARE                                                                   |
| Erin                              | Pichiotino |                       |                  | Prisma Health - Upstate | Greenville, SC                           | Co-Investigator                                         | Aqueous-PREP and PREPARE                                                                   |
| Markus F                          | Loeffler   |                       |                  | Prisma Health - Upstate | Greenville, SC                           | Co-Investigator                                         | Aqueous-PREP and PREPARE                                                                   |

## Supplemental Online Content: Nonauthor Collaborators

\*Indicates required information. Only first name, last name, and suffix will appear in PubMed.

| *First Name and Middle Initial(s) | *Last Name | *Suffix (eg, Jr, III) | Academic Degrees | Institution             | Location (city, state/province, country) | Role or Contribution, eg, chair, principal investigator | Group (if more than 1 Group listed in the byline) and/or Subgroup (eg, Steering Committee) |
|-----------------------------------|------------|-----------------------|------------------|-------------------------|------------------------------------------|---------------------------------------------------------|--------------------------------------------------------------------------------------------|
| Austin A                          | Cole       |                       |                  | Prisma Health - Upstate | Greenville, SC                           | Co-Investigator                                         | Aqueous-PREP and PREPARE                                                                   |
| Ethan J                           | Maltz      |                       |                  | Prisma Health - Upstate | Greenville, SC                           | Co-Investigator                                         | Aqueous-PREP and PREPARE                                                                   |
| Wesley                            | Parker     |                       |                  | Prisma Health - Upstate | Greenville, SC                           | Co-Investigator                                         | Aqueous-PREP and PREPARE                                                                   |
| T Bennett                         | Ramsey     |                       |                  | Prisma Health - Upstate | Greenville, SC                           | Co-Investigator                                         | Aqueous-PREP and PREPARE                                                                   |
| Alex                              | Burnikel   |                       |                  | Prisma Health - Upstate | Greenville, SC                           | Co-Investigator                                         | Aqueous-PREP and PREPARE                                                                   |
| Michael                           | Colello    |                       |                  | Prisma Health - Upstate | Greenville, SC                           | Co-Investigator                                         | Aqueous-PREP and PREPARE                                                                   |
| Russell                           | Stewart    |                       |                  | Prisma Health - Upstate | Greenville, SC                           | Co-Investigator                                         | Aqueous-PREP and PREPARE                                                                   |
| Jeremy                            | Wise       |                       |                  | Prisma Health - Upstate | Greenville, SC                           | Co-Investigator                                         | Aqueous-PREP and PREPARE                                                                   |
| Matthew                           | Anderson   |                       |                  | Prisma Health - Upstate | Greenville, SC                           | Co-Investigator                                         | Aqueous-PREP and PREPARE                                                                   |
| Joshua                            | Eskew      |                       |                  | Prisma Health - Upstate | Greenville, SC                           | Co-Investigator                                         | Aqueous-PREP and PREPARE                                                                   |
| Benjamin                          | Judkins    |                       |                  | Prisma Health - Upstate | Greenville, SC                           | Co-Investigator                                         | Aqueous-PREP and PREPARE                                                                   |
| James M                           | Miller     |                       |                  | Prisma Health - Upstate | Greenville, SC                           | Co-Investigator                                         | Aqueous-PREP and PREPARE                                                                   |
| Stephanie L                       | Tanner     |                       |                  | Prisma Health - Upstate | Greenville, SC                           | Research Coordinator                                    | Aqueous-PREP and PREPARE                                                                   |
| Rebecca G                         | Snider     |                       |                  | Prisma Health - Upstate | Greenville, SC                           | Research Coordinator                                    | Aqueous-PREP and PREPARE                                                                   |
| Christine E                       | Townsend   |                       |                  | Prisma Health - Upstate | Greenville, SC                           | Research Coordinator                                    | Aqueous-PREP and PREPARE                                                                   |

## Supplemental Online Content: Nonauthor Collaborators

\*Indicates required information. Only first name, last name, and suffix will appear in PubMed.

| *First Name and Middle Initial(s) | *Last Name | *Suffix (eg, Jr, III) | Academic Degrees | Institution                             | Location (city, state/province, country) | Role or Contribution, eg, chair, principal investigator | Group (if more than 1 Group listed in the byline) and/or Subgroup (eg, Steering Committee) |
|-----------------------------------|------------|-----------------------|------------------|-----------------------------------------|------------------------------------------|---------------------------------------------------------|--------------------------------------------------------------------------------------------|
| Kayla H                           | Pham       |                       |                  | Prisma Health - Upstate                 | Greenville, SC                           | Research Coordinator                                    | Aqueous-PREP and PREPARE                                                                   |
| Abigail                           | Martin     |                       |                  | Prisma Health - Upstate                 | Greenville, SC                           | Research Coordinator                                    | Aqueous-PREP and PREPARE                                                                   |
| Emily                             | Robertson  |                       |                  | Prisma Health - Upstate                 | Greenville, SC                           | Research Coordinator                                    | Aqueous-PREP and PREPARE                                                                   |
| Emily                             | Bray       |                       |                  | Prisma Health - Upstate                 | Greenville, SC                           | Research Coordinator                                    | Aqueous-PREP and PREPARE                                                                   |
| J Wilson Sykes                    |            |                       |                  | Prisma Health - Upstate                 | Greenville, SC                           | Research Coordinator                                    | Aqueous-PREP and PREPARE                                                                   |
| Krystina                          | Yoder      |                       |                  | Prisma Health - Upstate                 | Greenville, SC                           | Research Coordinator                                    | Aqueous-PREP and PREPARE                                                                   |
| Kelsey                            | Conner     |                       |                  | Prisma Health - Upstate                 | Greenville, SC                           | Research Coordinator                                    | Aqueous-PREP and PREPARE                                                                   |
| Harper                            | Abbott     |                       |                  | Prisma Health - Upstate                 | Greenville, SC                           | Research Coordinator                                    | Aqueous-PREP and PREPARE                                                                   |
| Saam                              | Morshed    |                       |                  | University of California, San Francisco | San Francisco, CA                        | Local Principal Investigator                            | Aqueous-PREP and PREPARE                                                                   |
| Meir                              | Mormor     |                       |                  | University of California, San Francisco | San Francisco, CA                        | Local Principal Investigator                            | Aqueous-PREP and PREPARE                                                                   |
| Theodore                          | Miclau     |                       |                  | University of California, San Francisco | San Francisco, CA                        | Local Principal Investigator                            | Aqueous-PREP and PREPARE                                                                   |
| Amir                              | Matityahu  |                       |                  | University of California, San Francisco | San Francisco, CA                        | Co-Investigator                                         | Aqueous-PREP and PREPARE                                                                   |
| R Trigg                           | McClellan  |                       |                  | University of California, San Francisco | San Francisco, CA                        | Co-Investigator                                         | Aqueous-PREP and PREPARE                                                                   |
| David                             | Shearer    |                       |                  | University of California, San Francisco | San Francisco, CA                        | Co-Investigator                                         | Aqueous-PREP and PREPARE                                                                   |
| Paul                              | Toogood    |                       |                  | University of California, San Francisco | San Francisco, CA                        | Co-Investigator                                         | Aqueous-PREP and PREPARE                                                                   |

## Supplemental Online Content: Nonauthor Collaborators

\*Indicates required information. Only first name, last name, and suffix will appear in PubMed.

| *First Name and Middle Initial(s) | *Last Name         | *Suffix (eg, Jr, III) | Academic Degrees | Institution                                 | Location (city, state/province, country) | Role or Contribution, eg, chair, principal investigator | Group (if more than 1 Group listed in the byline) and/or Subgroup (eg, Steering Committee) |
|-----------------------------------|--------------------|-----------------------|------------------|---------------------------------------------|------------------------------------------|---------------------------------------------------------|--------------------------------------------------------------------------------------------|
| Anthony                           | Ding               |                       |                  | University of California, San Francisco     | San Francisco, CA                        | Co-Investigator                                         | Aqueous-PREP and PREPARE                                                                   |
| Jothi                             | Murali             |                       |                  | University of California, San Francisco     | San Francisco, CA                        | Co-Investigator                                         | Aqueous-PREP and PREPARE                                                                   |
| Ashraf                            | El Naga            |                       |                  | University of California, San Francisco     | San Francisco, CA                        | Co-Investigator                                         | Aqueous-PREP and PREPARE                                                                   |
| Jennifer                          | Tangtiphaiboontana |                       |                  | University of California, San Francisco     | San Francisco, CA                        | Research Coordinator                                    | Aqueous-PREP and PREPARE                                                                   |
| Tigist                            | Belaye             |                       |                  | University of California, San Francisco     | San Francisco, CA                        | Research Coordinator                                    | Aqueous-PREP and PREPARE                                                                   |
| Eleni                             | Berhaneselase      |                       |                  | University of California, San Francisco     | San Francisco, CA                        | Research Coordinator                                    | Aqueous-PREP and PREPARE                                                                   |
| Dmitry                            | Pokhvaschey        |                       |                  | University of California, San Francisco     | San Francisco, CA                        | Research Coordinator                                    | Aqueous-PREP and PREPARE                                                                   |
| Joshua L                          | Gary               |                       |                  | McGovern Medical School at UTHealth Houston | Houston, TX                              | Local Principal Investigator                            | Aqueous-PREP                                                                               |
| Stephen J                         | Warner             |                       |                  | McGovern Medical School at UTHealth Houston | Houston, TX                              | Co-Investigator                                         | Aqueous-PREP                                                                               |
| John W                            | Munz               |                       |                  | McGovern Medical School at UTHealth Houston | Houston, TX                              | Co-Investigator                                         | Aqueous-PREP                                                                               |
| Andrew M                          | Choo               |                       |                  | McGovern Medical School at UTHealth Houston | Houston, TX                              | Co-Investigator                                         | Aqueous-PREP                                                                               |
| Timothy S                         | Achor              |                       |                  | McGovern Medical School at UTHealth Houston | Houston, TX                              | Co-Investigator                                         | Aqueous-PREP                                                                               |
| Milton L "Chip"                   | Routt              |                       |                  | McGovern Medical School at UTHealth Houston | Houston, TX                              | Co-Investigator                                         | Aqueous-PREP                                                                               |
| Michael Kutzler                   | Kutzler            |                       |                  | McGovern Medical School at UTHealth Houston | Houston, TX                              | Research Coordinator                                    | Aqueous-PREP                                                                               |
| Sterling                          | Boutte             |                       |                  | McGovern Medical School at UTHealth Houston | Houston, TX                              | Research Coordinator                                    | Aqueous-PREP                                                                               |

## Supplemental Online Content: Nonauthor Collaborators

\*Indicates required information. Only first name, last name, and suffix will appear in PubMed.

| *First Name and Middle Initial(s) | *Last Name       | *Suffix (eg, Jr, III) | Academic Degrees | Institution                                 | Location (city, state/province, country) | Role or Contribution, eg, chair, principal investigator | Group (if more than 1 Group listed in the byline) and/or Subgroup (eg, Steering Committee) |
|-----------------------------------|------------------|-----------------------|------------------|---------------------------------------------|------------------------------------------|---------------------------------------------------------|--------------------------------------------------------------------------------------------|
| Ryan J                            | Warth            |                       |                  | McGovern Medical School at UTHealth Houston | Houston, TX                              | Research Coordinator                                    | Aqueous-PREP                                                                               |
| Jennifer E                        | Hagen            |                       |                  | University of Florida                       | Gainesville, FL                          | Local Principal Investigator                            | Aqueous-PREP                                                                               |
| Matthew                           | Patrick          |                       |                  | University of Florida                       | Gainesville, FL                          | Co-Investigator                                         | Aqueous-PREP                                                                               |
| Richard                           | Vlasak           |                       |                  | University of Florida                       | Gainesville, FL                          | Co-Investigator                                         | Aqueous-PREP                                                                               |
| Thomas                            | Krupko           |                       |                  | University of Florida                       | Gainesville, FL                          | Co-Investigator                                         | Aqueous-PREP                                                                               |
| Michael                           | Talerico         |                       |                  | University of Florida                       | Gainesville, FL                          | Research Coordinator                                    | Aqueous-PREP                                                                               |
| Marybeth                          | Horodyski        |                       |                  | University of Florida                       | Gainesville, FL                          | Research Coordinator                                    | Aqueous-PREP                                                                               |
| Marissa                           | Pazik            |                       |                  | University of Florida                       | Gainesville, FL                          | Research Coordinator                                    | Aqueous-PREP                                                                               |
| Elizabeth                         | Lossada-Soto     |                       |                  | University of Florida                       | Gainesville, FL                          | Research Coordinator                                    | Aqueous-PREP                                                                               |
| Niloofar                          | Dehghan          |                       |                  | The CORE Institute                          | Phoenix, AZ                              | Local Principal Investigator                            | Aqueous-PREP                                                                               |
| Michael                           | McKee            |                       |                  | The CORE Institute                          | Phoenix, AZ                              | Co-Investigator                                         | Aqueous-PREP                                                                               |
| Clifford B                        | Jones            |                       |                  | The CORE Institute                          | Phoenix, AZ                              | Local Principal Investigator                            | Aqueous-PREP                                                                               |
| Debra L                           | Sietsema         |                       |                  | The CORE Institute                          | Phoenix, AZ                              | Research Coordinator                                    | Aqueous-PREP                                                                               |
| Alyse                             | Williams         |                       |                  | The CORE Institute                          | Phoenix, AZ                              | Research Coordinator                                    | Aqueous-PREP                                                                               |
| Tayler                            | Dykes            |                       |                  | The CORE Institute                          | Phoenix, AZ                              | Research Coordinator                                    | Aqueous-PREP                                                                               |
| Ernesto                           | Guerra-Farfan    |                       |                  | Vall d'Hebron University Hospital           | Barcelona, Spain                         | Local Principal Investigator                            | Aqueous-PREP                                                                               |
| Jordi                             | Thomas-Hernandez |                       |                  | Vall d'Hebron University Hospital           | Barcelona, Spain                         |                                                         | Aqueous-PREP                                                                               |
| Jordi                             | Teixidor-Serra   |                       |                  | Vall d'Hebron University Hospital           | Barcelona, Spain                         |                                                         | Aqueous-PREP                                                                               |

## Supplemental Online Content: Nonauthor Collaborators

\*Indicates required information. Only first name, last name, and suffix will appear in PubMed.

| *First Name and Middle Initial(s) | *Last Name             | *Suffix (eg, Jr, III) | Academic Degrees | Institution                       | Location (city, state/province, country) | Role or Contribution, eg, chair, principal investigator | Group (if more than 1 Group listed in the byline) and/or Subgroup (eg, Steering Committee) |
|-----------------------------------|------------------------|-----------------------|------------------|-----------------------------------|------------------------------------------|---------------------------------------------------------|--------------------------------------------------------------------------------------------|
| Vicente                           | Molero-Garcia          |                       |                  | Vall d'Hebron University Hospital | Barcelona, Spain                         |                                                         | Aqueous-PREP                                                                               |
| Jordi                             | Selga-Marsa            |                       |                  | Vall d'Hebron University Hospital | Barcelona, Spain                         |                                                         | Aqueous-PREP                                                                               |
| Juan Antonio                      | Porcel-Vazquez         |                       |                  | Vall d'Hebron University Hospital | Barcelona, Spain                         |                                                         | Aqueous-PREP                                                                               |
| Jose Vicente                      | Andres-Peiro           |                       |                  | Vall d'Hebron University Hospital | Barcelona, Spain                         |                                                         | Aqueous-PREP                                                                               |
| Ignacio                           | Esteban-Feliu          |                       |                  | Vall d'Hebron University Hospital | Barcelona, Spain                         |                                                         | Aqueous-PREP                                                                               |
| Nuria                             | Vidal-Tarrason         |                       |                  | Vall d'Hebron University Hospital | Barcelona, Spain                         |                                                         | Aqueous-PREP                                                                               |
| Jordi                             | Serracanta             |                       |                  | Vall d'Hebron University Hospital | Barcelona, Spain                         |                                                         | Aqueous-PREP                                                                               |
| Jorge                             | Nuñez-Camarena         |                       |                  | Vall d'Hebron University Hospital | Barcelona, Spain                         |                                                         | Aqueous-PREP                                                                               |
| Maria                             | del Mar Villar-Casares |                       |                  | Vall d'Hebron University Hospital | Barcelona, Spain                         |                                                         | Aqueous-PREP                                                                               |
| Juame                             | Mestre-Torres          |                       |                  | Vall d'Hebron University Hospital | Barcelona, Spain                         |                                                         | Aqueous-PREP                                                                               |
| Pilar                             | Lalueza-Broto          |                       |                  | Vall d'Hebron University Hospital | Barcelona, Spain                         |                                                         | Aqueous-PREP                                                                               |
| Felipe                            | Moreira-Borim          |                       |                  | Vall d'Hebron University Hospital | Barcelona, Spain                         |                                                         | Aqueous-PREP                                                                               |
| Yaiza                             | Garcia-Sanchez         |                       |                  | Vall d'Hebron University Hospital | Barcelona, Spain                         | Research Coordinator                                    | Aqueous-PREP                                                                               |
| Francesc                          | Marcano-Fernández      |                       |                  | Hospital Universitari Parc Tauli  | Barcelona, Spain                         | Local Principal Investigator                            | Aqueous-PREP                                                                               |
| Laia                              | Martínez-Carreres      |                       |                  | Hospital Universitari Parc Tauli  | Barcelona, Spain                         |                                                         | Aqueous-PREP                                                                               |
| David                             | Marti-Garin            |                       |                  | Hospital Universitari Parc Tauli  | Barcelona, Spain                         |                                                         | Aqueous-PREP                                                                               |
| Jorge                             | Serrano-Sanz           |                       |                  | Hospital Universitari Parc Tauli  | Barcelona, Spain                         |                                                         | Aqueous-PREP                                                                               |
| Joel                              | Sánchez-Fernández      |                       |                  | Hospital Universitari Parc Tauli  | Barcelona, Spain                         |                                                         | Aqueous-PREP                                                                               |
| Matsuyama                         | Sanz-Molero            |                       |                  | Hospital Universitari Parc Tauli  | Barcelona, Spain                         |                                                         | Aqueous-PREP                                                                               |
| Alejandro                         | Carballo               |                       |                  | Hospital Universitari Parc Tauli  | Barcelona, Spain                         |                                                         | Aqueous-PREP                                                                               |
| Xavier                            | Pelfort                |                       |                  | Hospital Universitari Parc Tauli  | Barcelona, Spain                         |                                                         | Aqueous-PREP                                                                               |
| Francesc                          | Acerboni-Flores        |                       |                  | Hospital Universitari Parc Tauli  | Barcelona, Spain                         |                                                         | Aqueous-PREP                                                                               |
| Anna                              | Alavedra-Massana       |                       |                  | Hospital Universitari Parc Tauli  | Barcelona, Spain                         |                                                         | Aqueous-PREP                                                                               |

## Supplemental Online Content: Nonauthor Collaborators

\*Indicates required information. Only first name, last name, and suffix will appear in PubMed.

| *First Name and Middle Initial(s) | *Last Name       | *Suffix (eg, Jr, III) | Academic Degrees | Institution                      | Location (city, state/province, country) | Role or Contribution, eg, chair, principal investigator | Group (if more than 1 Group listed in the byline) and/or Subgroup (eg, Steering Committee) |
|-----------------------------------|------------------|-----------------------|------------------|----------------------------------|------------------------------------------|---------------------------------------------------------|--------------------------------------------------------------------------------------------|
| Neus                              | Anglada-Torres   |                       |                  | Hospital Universitari Parc Tauli | Barcelona, Spain                         |                                                         | Aqueous-PREP                                                                               |
| Alexandre                         | Berenguer        |                       |                  | Hospital Universitari Parc Tauli | Barcelona, Spain                         |                                                         | Aqueous-PREP                                                                               |
| Jaume                             | Cámara-Cabrera   |                       |                  | Hospital Universitari Parc Tauli | Barcelona, Spain                         |                                                         | Aqueous-PREP                                                                               |
| Ariadna                           | Caparros-García  |                       |                  | Hospital Universitari Parc Tauli | Barcelona, Spain                         |                                                         | Aqueous-PREP                                                                               |
| Ferran                            | Fillat-Gomà      |                       |                  | Hospital Universitari Parc Tauli | Barcelona, Spain                         |                                                         | Aqueous-PREP                                                                               |
| Ruben                             | Fuentes-López    |                       |                  | Hospital Universitari Parc Tauli | Barcelona, Spain                         |                                                         | Aqueous-PREP                                                                               |
| Ramona                            | Garcia-Rodriguez |                       |                  | Hospital Universitari Parc Tauli | Barcelona, Spain                         |                                                         | Aqueous-PREP                                                                               |
| Nuria                             | Gimeno-Calavia   |                       |                  | Hospital Universitari Parc Tauli | Barcelona, Spain                         |                                                         | Aqueous-PREP                                                                               |
| Marta                             | Martínez-Álvarez |                       |                  | Hospital Universitari Parc Tauli | Barcelona, Spain                         |                                                         | Aqueous-PREP                                                                               |
| Patricia                          | Martínez-Grau    |                       |                  | Hospital Universitari Parc Tauli | Barcelona, Spain                         |                                                         | Aqueous-PREP                                                                               |
| Raúl                              | Pellejero-García |                       |                  | Hospital Universitari Parc Tauli | Barcelona, Spain                         |                                                         | Aqueous-PREP                                                                               |
| Ona                               | Ràfols-Perramon  |                       |                  | Hospital Universitari Parc Tauli | Barcelona, Spain                         |                                                         | Aqueous-PREP                                                                               |
| Juan                              | Manuel Peñalver  |                       |                  | Hospital Universitari Parc Tauli | Barcelona, Spain                         |                                                         | Aqueous-PREP                                                                               |
| Monica                            | Salomó Domènech  |                       |                  | Hospital Universitari Parc Tauli | Barcelona, Spain                         |                                                         | Aqueous-PREP                                                                               |
| Albert                            | Soler-Cano       |                       |                  | Hospital Universitari Parc Tauli | Barcelona, Spain                         |                                                         | Aqueous-PREP                                                                               |
| Aldo                              | Velasco-Barrera  |                       |                  | Hospital Universitari Parc Tauli | Barcelona, Spain                         |                                                         | Aqueous-PREP                                                                               |
| Christian                         | Yela-Verdú       |                       |                  | Hospital Universitari Parc Tauli | Barcelona, Spain                         |                                                         | Aqueous-PREP                                                                               |
| Mercedes                          | Bueno-Ruiz       |                       |                  | Hospital Universitari Parc Tauli | Barcelona, Spain                         |                                                         | Aqueous-PREP                                                                               |
| Estrella                          | Sánchez-Palomino |                       |                  | Hospital Universitari Parc Tauli | Barcelona, Spain                         |                                                         | Aqueous-PREP                                                                               |
| Vito                              | Andriola         |                       |                  | Hospital Universitari Parc Tauli | Barcelona, Spain                         |                                                         | Aqueous-PREP                                                                               |



## Supplemental Online Content: Nonauthor Collaborators

\*Indicates required information. Only first name, last name, and suffix will appear in PubMed.

| *First Name and Middle Initial(s) | *Last Name          | *Suffix (eg, Jr, III) | Academic Degrees | Institution                      | Location (city, state/province, country) | Role or Contribution, eg, chair, principal investigator | Group (if more than 1 Group listed in the byline) and/or Subgroup (eg, Steering Committee) |
|-----------------------------------|---------------------|-----------------------|------------------|----------------------------------|------------------------------------------|---------------------------------------------------------|--------------------------------------------------------------------------------------------|
| Matilde                           | Molina-Corbacho     |                       |                  | Hospital Universitari Parc Tauli | Barcelona, Spain                         |                                                         | Aqueous-PREP                                                                               |
| Yeray                             | Maldonado-Sotoca    |                       |                  | Hospital Universitari Parc Tauli | Barcelona, Spain                         |                                                         | Aqueous-PREP                                                                               |
| Alfons                            | Gasset-Teixidor     |                       |                  | Hospital Universitari Parc Tauli | Barcelona, Spain                         |                                                         | Aqueous-PREP                                                                               |
| Jorge                             | Blasco-Moreu        |                       |                  | Hospital Universitari Parc Tauli | Barcelona, Spain                         |                                                         | Aqueous-PREP                                                                               |
| Núria                             | Fernández-Poch      |                       |                  | Hospital Universitari Parc Tauli | Barcelona, Spain                         |                                                         | Aqueous-PREP                                                                               |
| Josep                             | Rodoreda-Puigdemasa |                       |                  | Hospital Universitari Parc Tauli | Barcelona, Spain                         |                                                         | Aqueous-PREP                                                                               |
| Arnau                             | Verdaguer-Figuerola |                       |                  | Hospital Universitari Parc Tauli | Barcelona, Spain                         |                                                         | Aqueous-PREP                                                                               |
| Heber Enrique                     | Cueva-Sevieri       |                       |                  | Hospital Universitari Parc Tauli | Barcelona, Spain                         |                                                         | Aqueous-PREP                                                                               |
| Santiago                          | Garcia-Gimenez      |                       |                  | Hospital Universitari Parc Tauli | Barcelona, Spain                         |                                                         | Aqueous-PREP                                                                               |
| William T                         | Obremsky            |                       |                  | Vanderbilt Medical Center        | Nashville, TN                            | Local Principal Investigator                            | Aqueous-PREP                                                                               |
| Amir Alex                         | Jahangir            |                       |                  | Vanderbilt Medical Center        | Nashville, TN                            | Co-Investigator                                         | Aqueous-PREP                                                                               |
| Manish                            | Sethi               |                       |                  | Vanderbilt Medical Center        | Nashville, TN                            | Co-Investigator                                         | Aqueous-PREP                                                                               |
| Robert                            | Boyce               |                       |                  | Vanderbilt Medical Center        | Nashville, TN                            | Co-Investigator                                         | Aqueous-PREP                                                                               |
| Daniel J                          | Stinner             |                       |                  | Vanderbilt Medical Center        | Nashville, TN                            | Co-Investigator                                         | Aqueous-PREP                                                                               |
| Phillip                           | Mitchell            |                       |                  | Vanderbilt Medical Center        | Nashville, TN                            | Co-Investigator                                         | Aqueous-PREP                                                                               |
| Karen                             | Trochez             |                       |                  | Vanderbilt Medical Center        | Nashville, TN                            | Research Coordinator                                    | Aqueous-PREP                                                                               |
| Elsa                              | Rodriguez           |                       |                  | Vanderbilt Medical Center        | Nashville, TN                            | Research Coordinator                                    | Aqueous-PREP                                                                               |
| Charles                           | Pritchett           |                       |                  | Vanderbilt Medical Center        | Nashville, TN                            | Research Coordinator                                    | Aqueous-PREP                                                                               |
| Natalie                           | Hogan               |                       |                  | Vanderbilt Medical Center        | Nashville, TN                            | Research Coordinator                                    | Aqueous-PREP                                                                               |

## Supplemental Online Content: Nonauthor Collaborators

\*Indicates required information. Only first name, last name, and suffix will appear in PubMed.

| *First Name and Middle Initial(s) | *Last Name     | *Suffix (eg, Jr, III) | Academic Degrees | Institution                               | Location (city, state/province, country) | Role or Contribution, eg, chair, principal investigator | Group (if more than 1 Group listed in the byline) and/or Subgroup (eg, Steering Committee) |
|-----------------------------------|----------------|-----------------------|------------------|-------------------------------------------|------------------------------------------|---------------------------------------------------------|--------------------------------------------------------------------------------------------|
| A Fidel                           | Moreno         |                       |                  | Vanderbilt Medical Center                 | Nashville, TN                            | Research Coordinator                                    | Aqueous-PREP                                                                               |
| Christina                         | Boulton        |                       |                  | Banner University Medical Center – Tucson | Tucson, AZ                               | Local Principal Investigator                            | Aqueous-PREP                                                                               |
| Jason                             | Lowe           |                       |                  | Banner University Medical Center – Tucson | Tucson, AZ                               | Co-Investigator                                         | Aqueous-PREP                                                                               |
| John T                            | Ruth           |                       |                  | Banner University Medical Center – Tucson | Tucson, AZ                               | Co-Investigator                                         | Aqueous-PREP                                                                               |
| Brad                              | Askam          |                       |                  | Banner University Medical Center – Tucson | Tucson, AZ                               | Co-Investigator                                         | Aqueous-PREP                                                                               |
| Andrea                            | Seach          |                       |                  | Banner University Medical Center – Tucson | Tucson, AZ                               | Manager                                                 | Aqueous-PREP                                                                               |
| Alejandro                         | Cruz           |                       |                  | Banner University Medical Center – Tucson | Tucson, AZ                               | Research Coordinator                                    | Aqueous-PREP                                                                               |
| Breanna                           | Featherston    |                       |                  | Banner University Medical Center – Tucson | Tucson, AZ                               | Research Coordinator                                    | Aqueous-PREP                                                                               |
| Robin                             | Carlson        |                       |                  | Banner University Medical Center – Tucson | Tucson, AZ                               | Research Coordinator                                    | Aqueous-PREP                                                                               |
| Iliana                            | Romero         |                       |                  | Banner University Medical Center – Tucson | Tucson, AZ                               | Research Coordinator                                    | Aqueous-PREP                                                                               |
| Isaac                             | Zarif          |                       |                  | Banner University Medical Center – Tucson | Tucson, AZ                               | Research Coordinator                                    | Aqueous-PREP                                                                               |
| Michael                           | Prayson        |                       |                  | Wright State University                   | Dayton, OH                               | Local Principal Investigator                            | Aqueous-PREP                                                                               |
| Indresh                           | Venkatarayappa |                       |                  | Wright State University                   | Dayton, OH                               | Co-Investigator                                         | Aqueous-PREP                                                                               |
| Brandon                           | Horne          |                       |                  | Wright State University                   | Dayton, OH                               | Co-Investigator                                         | Aqueous-PREP                                                                               |
| Jennifer                          | Jerele         |                       |                  | Wright State University                   | Dayton, OH                               | Co-Investigator                                         | Aqueous-PREP                                                                               |
| Linda                             | Clark          |                       |                  | Wright State University                   | Dayton, OH                               | Research Coordinator                                    | Aqueous-PREP                                                                               |

## Supplemental Online Content: Nonauthor Collaborators

\*Indicates required information. Only first name, last name, and suffix will appear in PubMed.

| *First Name and Middle Initial(s) | *Last Name | *Suffix (eg, Jr, III) | Academic Degrees | Institution                                      | Location (city, state/province, country) | Role or Contribution, eg, chair, principal investigator | Group (if more than 1 Group listed in the byline) and/or Subgroup (eg, Steering Committee) |
|-----------------------------------|------------|-----------------------|------------------|--------------------------------------------------|------------------------------------------|---------------------------------------------------------|--------------------------------------------------------------------------------------------|
| Nicholas M                        | Romeo      |                       |                  | MetroHealth Medical Center                       | Cleveland, OH                            | Local Principal Investigator                            | PREPARE                                                                                    |
| Heather A                         | Vallier    |                       |                  | MetroHealth Medical Center                       | Cleveland, OH                            | Co-Investigator                                         | PREPARE                                                                                    |
| Anna                              | Vergon     |                       |                  | MetroHealth Medical Center                       | Cleveland, OH                            | Research Assistant                                      | PREPARE                                                                                    |
| Darius G                          | Viskontas  |                       |                  | FRASER HEALTH AUTHORITY/Royal Columbian Hospital | New Westminster, BC                      | Local Principal Investigator                            | PREPARE                                                                                    |
| Kelly L                           | Apostle    |                       |                  | FRASER HEALTH AUTHORITY/Royal Columbian Hospital | New Westminster, BC                      | Co-Investigator                                         | PREPARE                                                                                    |
| Dory S                            | Boyer      |                       |                  | FRASER HEALTH AUTHORITY/Royal Columbian Hospital | New Westminster, BC                      | Co-Investigator                                         | PREPARE                                                                                    |
| Farhad O                          | Moola      |                       |                  | FRASER HEALTH AUTHORITY/Royal Columbian Hospital | New Westminster, BC                      | Co-Investigator                                         | PREPARE                                                                                    |
| Bertrand H                        | Perey      |                       |                  | FRASER HEALTH AUTHORITY/Royal Columbian Hospital | New Westminster, BC                      | Co-Investigator                                         | PREPARE                                                                                    |
| Trevor B                          | Stone      |                       |                  | FRASER HEALTH AUTHORITY/Royal Columbian Hospital | New Westminster, BC                      | Co-Investigator                                         | PREPARE                                                                                    |
| H Michael                         | Lemke      |                       |                  | FRASER HEALTH AUTHORITY/Royal Columbian Hospital | New Westminster, BC                      | Co-Investigator                                         | PREPARE                                                                                    |
| Ella                              | Spicer     |                       |                  | FRASER HEALTH AUTHORITY/Royal Columbian Hospital | New Westminster, BC                      | Research Coordinator                                    | PREPARE                                                                                    |
| Krysten                           | Payne      |                       |                  | FRASER HEALTH AUTHORITY/Royal Columbian Hospital | New Westminster, BC                      | Research Assistant                                      | PREPARE                                                                                    |

## Supplemental Online Content: Nonauthor Collaborators

\*Indicates required information. Only first name, last name, and suffix will appear in PubMed.

| *First Name and Middle Initial(s) | *Last Name   | *Suffix (eg, Jr, III) | Academic Degrees | Institution                                                       | Location (city, state/province, country) | Role or Contribution, eg, chair, principal investigator | Group (if more than 1 Group listed in the byline) and/or Subgroup (eg, Steering Committee) |
|-----------------------------------|--------------|-----------------------|------------------|-------------------------------------------------------------------|------------------------------------------|---------------------------------------------------------|--------------------------------------------------------------------------------------------|
| Kevin                             | Phelps       |                       |                  | Carolinas Medical Center, Atrium Health Musculoskeletal Institute | Charlotte, NC                            | Local Principal Investigator                            | PREPARE                                                                                    |
| Michael                           | Bosse        |                       |                  | Carolinas Medical Center, Atrium Health Musculoskeletal Institute | Charlotte, NC                            | Co-Investigator                                         | PREPARE                                                                                    |
| Madhav                            | Karunakar    |                       |                  | Carolinas Medical Center, Atrium Health Musculoskeletal Institute | Charlotte, NC                            | Co-Investigator                                         | PREPARE                                                                                    |
| Laurence                          | Kempton      |                       |                  | Carolinas Medical Center, Atrium Health Musculoskeletal Institute | Charlotte, NC                            | Co-Investigator                                         | PREPARE                                                                                    |
| Stephen                           | Sims         |                       |                  | Carolinas Medical Center, Atrium Health Musculoskeletal Institute | Charlotte, NC                            | Co-Investigator                                         | PREPARE                                                                                    |
| Joseph                            | Hsu          |                       |                  | Carolinas Medical Center, Atrium Health Musculoskeletal Institute | Charlotte, NC                            | Co-Investigator                                         | PREPARE                                                                                    |
| Rachel                            | Seymour      |                       |                  | Carolinas Medical Center, Atrium Health Musculoskeletal Institute | Charlotte, NC                            | Manager                                                 | PREPARE                                                                                    |
| Christine                         | Churchill    |                       |                  | Carolinas Medical Center, Atrium Health Musculoskeletal Institute | Charlotte, NC                            | Research Coordinator                                    | PREPARE                                                                                    |
| Ada                               | Mayfield     |                       |                  | Carolinas Medical Center, Atrium Health Musculoskeletal Institute | Charlotte, NC                            | Research Assistant                                      | PREPARE                                                                                    |
| Juliette                          | Sweeney      |                       |                  | Carolinas Medical Center, Atrium Health Musculoskeletal Institute | Charlotte, NC                            | Research Assistant                                      | PREPARE                                                                                    |
| Robert A                          | Hymes        |                       |                  | Inova Fairfax Medical Campus                                      | Falls Church, VA                         | Local Principal Investigator                            | PREPARE                                                                                    |
| Cary C                            | Schwartzbach |                       |                  | Inova Fairfax Medical Campus                                      | Falls Church, VA                         | Co-Investigator                                         | PREPARE                                                                                    |
| Jeff E                            | Schulman     |                       |                  | Inova Fairfax Medical Campus                                      | Falls Church, VA                         | Co-Investigator                                         | PREPARE                                                                                    |
| A Stephen                         | Malekzadeh   |                       |                  | Inova Fairfax Medical Campus                                      | Falls Church, VA                         | Co-Investigator                                         | PREPARE                                                                                    |
| Michael A                         | Holzman      |                       |                  | Inova Fairfax Medical Campus                                      | Falls Church, VA                         | Co-Investigator                                         | PREPARE                                                                                    |
| Greg E                            | Gaski        |                       |                  | Inova Fairfax Medical Campus                                      | Falls Church, VA                         | Co-Investigator                                         | PREPARE                                                                                    |
| Johnathan                         | Wills        |                       |                  | Inova Fairfax Medical Campus                                      | Falls Church, VA                         | Research Coordinator                                    | PREPARE                                                                                    |
| Holly                             | Pilson       |                       |                  | Wake Forest Baptist Health                                        | Winston-Salem, NC                        | Local Principal Investigator                            | PREPARE                                                                                    |

## Supplemental Online Content: Nonauthor Collaborators

\*Indicates required information. Only first name, last name, and suffix will appear in PubMed.

| *First Name and Middle Initial(s) | *Last Name    | *Suffix (eg, Jr, III) | Academic Degrees | Institution                        | Location (city, state/province, country) | Role or Contribution, eg, chair, principal investigator | Group (if more than 1 Group listed in the byline) and/or Subgroup (eg, Steering Committee) |
|-----------------------------------|---------------|-----------------------|------------------|------------------------------------|------------------------------------------|---------------------------------------------------------|--------------------------------------------------------------------------------------------|
| Eben A                            | Carroll       |                       |                  | Wake Forest Baptist Health         | Winston-Salem, NC                        | Co-Investigator                                         | PREPARE                                                                                    |
| Jason J                           | Halvorson     |                       |                  | Wake Forest Baptist Health         | Winston-Salem, NC                        | Co-Investigator                                         | PREPARE                                                                                    |
| Sharon                            | Babcock       |                       |                  | Wake Forest Baptist Health         | Winston-Salem, NC                        | Co-Investigator                                         | PREPARE                                                                                    |
| J Brett                           | Goodman       |                       |                  | Wake Forest Baptist Health         | Winston-Salem, NC                        | Research Coordinator                                    | PREPARE                                                                                    |
| Martha B                          | Holden        |                       |                  | Wake Forest Baptist Health         | Winston-Salem, NC                        | Research Assistant                                      | PREPARE                                                                                    |
| Wendy                             | Williams      |                       |                  | Wake Forest Baptist Health         | Winston-Salem, NC                        | Research Assistant                                      | PREPARE                                                                                    |
| Taylor                            | Hill          |                       |                  | Wake Forest Baptist Health         | Winston-Salem, NC                        | Research Assistant                                      | PREPARE                                                                                    |
| Ariel                             | Brotherton    |                       |                  | Wake Forest Baptist Health         | Winston-Salem, NC                        | Research Assistant                                      | PREPARE                                                                                    |
| Thomas F                          | Higgins       |                       |                  | University of Utah                 | Salt Lake City, Utah                     | Local Principal Investigator                            | PREPARE                                                                                    |
| Justin M                          | Haller        |                       |                  | University of Utah                 | Salt Lake City, Utah                     | Co-Investigator                                         | PREPARE                                                                                    |
| David L                           | Rothberg      |                       |                  | University of Utah                 | Salt Lake City, Utah                     | Co-Investigator                                         | PREPARE                                                                                    |
| Lucas S                           | Marchand      |                       |                  | University of Utah                 | Salt Lake City, Utah                     | Co-Investigator                                         | PREPARE                                                                                    |
| Zachary M                         | Olsen         |                       |                  | University of Utah                 | Salt Lake City, Utah                     | Co-Investigator                                         | PREPARE                                                                                    |
| Abby V                            | McGowan       |                       |                  | University of Utah                 | Salt Lake City, Utah                     | Research Coordinator                                    | PREPARE                                                                                    |
| Sophia                            | Hill          |                       |                  | University of Utah                 | Salt Lake City, Utah                     | Research Coordinator                                    | PREPARE                                                                                    |
| Morgan K                          | Dauk          |                       |                  | University of Utah                 | Salt Lake City, Utah                     | Research Coordinator                                    | PREPARE                                                                                    |
| I Leah                            | Gitajn        |                       |                  | Dartmouth-Hitchcock Medical Center | Lebanon, NH                              | Local Principal Investigator                            | PREPARE                                                                                    |
| Marcus                            | Coe           |                       |                  | Dartmouth-Hitchcock Medical Center | Lebanon, NH                              | Co-Investigator                                         | PREPARE                                                                                    |
| Kevin                             | Dwyer         |                       |                  | Dartmouth-Hitchcock Medical Center | Lebanon, NH                              | Co-Investigator                                         | PREPARE                                                                                    |
| Devin S                           | Mullin        |                       |                  | Dartmouth-Hitchcock Medical Center | Lebanon, NH                              | Research Coordinator                                    | PREPARE                                                                                    |
| Theresa A                         | Chockbengboun |                       |                  | Dartmouth-Hitchcock Medical Center | Lebanon, NH                              | Research Assistant                                      | PREPARE                                                                                    |

## Supplemental Online Content: Nonauthor Collaborators

\*Indicates required information. Only first name, last name, and suffix will appear in PubMed.

| *First Name and Middle Initial(s) | *Last Name | *Suffix (eg, Jr, III) | Academic Degrees | Institution                        | Location (city, state/province, country) | Role or Contribution, eg, chair, principal investigator | Group (if more than 1 Group listed in the byline) and/or Subgroup (eg, Steering Committee) |
|-----------------------------------|------------|-----------------------|------------------|------------------------------------|------------------------------------------|---------------------------------------------------------|--------------------------------------------------------------------------------------------|
| Peter A                           | DePalo     | Sr                    |                  | Dartmouth-Hitchcock Medical Center | Lebanon, NH                              | Research Assistant                                      | PREPARE                                                                                    |
| Marilyn                           | Heng       |                       |                  | Massachusetts General Hospital     | Boston, MA                               | Local Principal Investigator                            | PREPARE                                                                                    |
| Mitchel B                         | Harris     |                       |                  | Massachusetts General Hospital     | Boston, MA                               | Co-Investigator                                         | PREPARE                                                                                    |
| David W                           | Lhowe      |                       |                  | Massachusetts General Hospital     | Boston, MA                               | Co-Investigator                                         | PREPARE                                                                                    |
| John G                            | Esposito   |                       |                  | Massachusetts General Hospital     | Boston, MA                               | Co-Investigator                                         | PREPARE                                                                                    |
| Ahmad                             | Alnasser   |                       |                  | Massachusetts General Hospital     | Boston, MA                               | Research Assistant                                      | PREPARE                                                                                    |
| Steven F                          | Shannon    |                       |                  | Bryan Medical Center               | Lincoln, NB                              | Co-Investigator                                         | PREPARE                                                                                    |
| Alesha N                          | Scott      |                       |                  | Bryan Medical Center               | Lincoln, NB                              | Co-Investigator                                         | PREPARE                                                                                    |
| Bobbi                             | Clinch     |                       |                  | Bryan Medical Center               | Lincoln, NB                              | Research Coordinator                                    | PREPARE                                                                                    |
| Becky                             | Webber     |                       |                  | Bryan Medical Center               | Lincoln, NB                              | Research Coordinator                                    | PREPARE                                                                                    |
| Michael J                         | Beltran    |                       |                  | University of Cincinnati           | Cincinnati, OH                           | Co-Investigator                                         | PREPARE                                                                                    |
| Michael T                         | Archdeacon |                       |                  | University of Cincinnati           | Cincinnati, OH                           | Co-Investigator                                         | PREPARE                                                                                    |
| Henry Claude                      | Sagi       |                       |                  | University of Cincinnati           | Cincinnati, OH                           | Co-Investigator                                         | PREPARE                                                                                    |
| John D                            | Wyrick     |                       |                  | University of Cincinnati           | Cincinnati, OH                           | Co-Investigator                                         | PREPARE                                                                                    |
| Theodore Toan                     | Le         |                       |                  | University of Cincinnati           | Cincinnati, OH                           | Co-Investigator                                         | PREPARE                                                                                    |
| Richard T                         | Laughlin   |                       |                  | University of Cincinnati           | Cincinnati, OH                           | Co-Investigator                                         | PREPARE                                                                                    |
| Cameron G                         | Thomson    |                       |                  | University of Cincinnati           | Cincinnati, OH                           | Research Coordinator                                    | PREPARE                                                                                    |
| Kimberly                          | Hasselfeld |                       |                  | University of Cincinnati           | Cincinnati, OH                           | Research Coordinator                                    | PREPARE                                                                                    |
| Carol A                           | Lin        |                       |                  | Cedars-Sinai Medical Center        | Los Angeles, CA                          | Co-Investigator                                         | PREPARE                                                                                    |
| Mark S                            | Vrahas     |                       |                  | Cedars-Sinai Medical Center        | Los Angeles, CA                          | Co-Investigator                                         | PREPARE                                                                                    |
| Charles N                         | Moon       |                       |                  | Cedars-Sinai Medical Center        | Los Angeles, CA                          | Co-Investigator                                         | PREPARE                                                                                    |
| Milton T                          | Little     |                       |                  | Cedars-Sinai Medical Center        | Los Angeles, CA                          | Co-Investigator                                         | PREPARE                                                                                    |
| Geoffrey S                        | Marecek    |                       |                  | Cedars-Sinai Medical Center        | Los Angeles, CA                          | Co-Investigator                                         | PREPARE                                                                                    |
| Denice M                          | Dubaclet   |                       |                  | Cedars-Sinai Medical Center        | Los Angeles, CA                          | Research Coordinator                                    | PREPARE                                                                                    |

## Supplemental Online Content: Nonauthor Collaborators

\*Indicates required information. Only first name, last name, and suffix will appear in PubMed.

| *First Name and Middle Initial(s) | *Last Name | *Suffix (eg, Jr, III) | Academic Degrees | Institution                              | Location (city, state/province, country) | Role or Contribution, eg, chair, principal investigator | Group (if more than 1 Group listed in the byline) and/or Subgroup (eg, Steering Committee) |
|-----------------------------------|------------|-----------------------|------------------|------------------------------------------|------------------------------------------|---------------------------------------------------------|--------------------------------------------------------------------------------------------|
| John A                            | Scolaro    |                       |                  | University of California, Irvine         | Irvine, CA                               | Co-Investigator                                         | PREPARE                                                                                    |
| James R                           | Learned    |                       |                  | University of California, Irvine         | Irvine, CA                               | Co-Investigator                                         | PREPARE                                                                                    |
| Philip K                          | Lim        |                       |                  | University of California, Irvine         | Irvine, CA                               | Co-Investigator                                         | PREPARE                                                                                    |
| Susan                             | Demas      |                       |                  | University of California, Irvine         | Irvine, CA                               | Co-Investigator                                         | PREPARE                                                                                    |
| Arya                              | Amirhekmat |                       |                  | University of California, Irvine         | Irvine, CA                               | Research Coordinator                                    | PREPARE                                                                                    |
| Yan Marco                         | Dela Cruz  |                       |                  | University of California, Irvine         | Irvine, CA                               | Research Coordinator                                    | PREPARE                                                                                    |
| Patrick F                         | Bergin     |                       |                  | University of Mississippi Medical Center | Jackson, MS                              | Local Principal Investigator                            | PREPARE                                                                                    |
| George V                          | Russell    |                       |                  | University of Mississippi Medical Center | Jackson, MS                              | Co-Investigator                                         | PREPARE                                                                                    |
| Matthew L                         | Graves     |                       |                  | University of Mississippi Medical Center | Jackson, MS                              | Co-Investigator                                         | PREPARE                                                                                    |
| John                              | Morellato  |                       |                  | University of Mississippi Medical Center | Jackson, MS                              | Co-Investigator                                         | PREPARE                                                                                    |
| Sheketha L                        | McGee      |                       |                  | University of Mississippi Medical Center | Jackson, MS                              | Research Coordinator                                    | PREPARE                                                                                    |
| Eldrin L                          | Bhanat     |                       |                  | University of Mississippi Medical Center | Jackson, MS                              | Research Assistant                                      | PREPARE                                                                                    |
| Ugur                              | Yener      |                       |                  | University of Mississippi Medical Center | Jackson, MS                              | Research Coordinator                                    | PREPARE                                                                                    |
| Rajinder                          | Khanna     |                       |                  | University of Mississippi Medical Center | Jackson, MS                              | Research Coordinator                                    | PREPARE                                                                                    |
| Priyanka                          | Nehete     |                       |                  | University of Mississippi Medical Center | Jackson, MS                              | Research Coordinator                                    | PREPARE                                                                                    |
| Samir                             | Mehta      |                       |                  | University of Pennsylvania               | Philadelphia, PA                         | Local Principal Investigator                            | PREPARE                                                                                    |
| Derek                             | Donehan    |                       |                  | University of Pennsylvania               | Philadelphia, PA                         | Co-Investigator                                         | PREPARE                                                                                    |
| Annamarie                         | Horan      |                       |                  | University of Pennsylvania               | Philadelphia, PA                         | Manager                                                 | PREPARE                                                                                    |
| Mary                              | Dooley     |                       |                  | University of Pennsylvania               | Philadelphia, PA                         | Research Assistant                                      | PREPARE                                                                                    |

## Supplemental Online Content: Nonauthor Collaborators

\*Indicates required information. Only first name, last name, and suffix will appear in PubMed.

| *First Name and Middle Initial(s) | *Last Name  | *Suffix (eg, Jr, III) | Academic Degrees | Institution                                                  | Location (city, state/province, country) | Role or Contribution, eg, chair, principal investigator | Group (if more than 1 Group listed in the byline) and/or Subgroup (eg, Steering Committee) |
|-----------------------------------|-------------|-----------------------|------------------|--------------------------------------------------------------|------------------------------------------|---------------------------------------------------------|--------------------------------------------------------------------------------------------|
| David                             | Potter      |                       |                  | Sanford Health                                               | Sioux Falls, SD                          | Local Principal Investigator                            | PREPARE                                                                                    |
| Robert                            | VanDemark   | III                   |                  | Sanford Health                                               | Sioux Falls, SD                          | Co-Investigator                                         | PREPARE                                                                                    |
| Kyle                              | Seabold     |                       |                  | Sanford Health                                               | Sioux Falls, SD                          | Research Coordinator                                    | PREPARE                                                                                    |
| Nicholas                          | Staudenmier |                       |                  | Sanford Health                                               | Sioux Falls, SD                          | Research Coordinator                                    | PREPARE                                                                                    |
| Michael J                         | Weaver      |                       |                  | Brigham Women's Hospital                                     | Boston, MA                               | Local Principal Investigator                            | PREPARE                                                                                    |
| Arvind G                          | von Keudell |                       |                  | Brigham Women's Hospital                                     | Boston, MA                               | Co-Investigator                                         | PREPARE                                                                                    |
| Abigail E                         | Sagona      |                       |                  | Brigham Women's Hospital                                     | Boston, MA                               | Research Assistant                                      | PREPARE                                                                                    |
| Todd                              | Jaebлон     |                       |                  | University of Maryland Prince George's Capital Region Health | Cheverly, MD                             | Local Principal Investigator                            | PREPARE                                                                                    |
| Robert                            | Beer        |                       |                  | University of Maryland Prince George's Capital Region Health | Cheverly, MD                             | Co-Investigator                                         | PREPARE                                                                                    |
| Haley K                           | Demyanovich |                       |                  | University of Maryland Prince George's Capital Region Health | Cheverly, MD                             | Research Coordinator                                    | PREPARE                                                                                    |
| Brent                             | Bauer       |                       |                  | University of Maryland Prince George's Capital Region Health | Cheverly, MD                             | Research Coordinator                                    | PREPARE                                                                                    |
| Sean                              | Meredith    |                       |                  | University of Maryland Prince George's Capital Region Health | Cheverly, MD                             | Research Coordinator                                    | PREPARE                                                                                    |
| Sneh                              | Talwar      |                       |                  | University of Maryland Prince George's Capital Region Health | Cheverly, MD                             | Research Coordinator                                    | PREPARE                                                                                    |
| Christopher M                     | Domes       |                       |                  | University of Wisconsin Madison                              | Madison, WI                              | Local Principal Investigator                            | PREPARE                                                                                    |
| Mark J                            | Gage        |                       |                  | Duke University Hospital                                     | Durham, NC                               | Local Principal Investigator                            | PREPARE                                                                                    |
| Rachel M                          | Reilly      |                       |                  | Duke University Hospital                                     | Durham, NC                               | Co-Investigator                                         | PREPARE                                                                                    |
| Ariana                            | Paniagua    |                       |                  | Duke University Hospital                                     | Durham, NC                               | Research Coordinator                                    | PREPARE                                                                                    |



Supplemental Online Content: Nonauthor Collaborators

\*Indicates required information. Only first name, last name, and suffix will appear in PubMed.

| <b>*First Name and Middle Initial(s)</b> | <b>*Last Name</b> | <b>*Suffix (eg, Jr, III)</b> | Academic Degrees | Institution              | Location (city, state/province, country) | Role or Contribution, eg, chair, principal investigator | Group (if more than 1 Group listed in the byline) and/or Subgroup (eg, Steering Committee) |
|------------------------------------------|-------------------|------------------------------|------------------|--------------------------|------------------------------------------|---------------------------------------------------------|--------------------------------------------------------------------------------------------|
| JaNell                                   | Depree            |                              |                  | Duke University Hospital | Durham, NC                               | Research Coordinator                                    | PREPARE                                                                                    |
