# Supplementary material for: Association of Patient-Level and Hospital-Level Factors With Timely Fracture Care by Race
Source: PubMed Central journal article supplement (PMC9713603; doi:10.1001/jamanetworkopen.2022.44357), 2022-11-30
Supplement: jamanetwopen-e2244357-s003.pdf [file jamanetwopen-e2244357-s003.pdf]

## **Data Sharing Statement**

### **Data**

**Data available:** No

### **Additional Information**

**Explanation for why data not available:** The data collected for this study is not open source, however, if there are questions/issues the data may be shared by study investigators.
